## Index rerum ad Vol. 21

Confecit WILHELM BAUMANN, Zürich

- Aguas minerales, 193  
Angioma renis, 18  
Anuria, prevention with Mannitol, 54
- Bassinet, opérations des tumeurs, 520  
Bladder, complications after X-radiation, 393, 437  
–, complications following hysterectomy, 444, 452  
–, experimental studies, 182  
–, resorption of radioactive-tagged substances, 538
- Carcinoma prostatae, 77  
Cystinurie, 477  
Cysto-plastics, 477
- Dimethylnitrosamine, renal carcinogenesis, 229
- Eaux minérales, 193  
Epididymis, granulomatous lesions, 564  
Estrechez uretral post-traumatica, 209
- Fertilitätsstörungen des Mannes, Immunreaktionen, 247  
Fertility disturbances, immune reactions, 247  
Fibrinolyseblutung, Behandlung mit p-Aminomethylbenzoesäure, 61
- Gemmangiom, 18  
Granulome du testicule et de l'épididyme, 564  
Gynecological surgery, ureteral complications, 452  
– –, vesical complications, 444, 452
- Haemangioblastom, 18  
Haemangiosarkom, 18  
Haematurie bei Angiom der Niere, 18  
Harnröhrenstriktur, posttraumatische, 209  
Harnblase, Experimente über Öffnungs- und Schließungsmechanismus, 182  
–, Komplikationen nach Bestrahlungen, 393, 437  
–, Komplikationen nach Hysterektomie, 444  
–, Resorption radioaktiver Substanzen, 538  
Harnreflux, 531  
Harnröhrenstenosen, Resultate der Johanson-Plastik, 465  
Hidronefrosis producida experimentalmente, 1  
Histokompatibilitätsmessung, 173  
Hoden, granulomatöse Veränderungen, 564  
Hypernephroma, 365  
Hydronephrosis experimentalis, 1  
Hysterectomy, vesical complications, 444, 452
- Immune reactions in male fertility disturbances, 247  
Immunreaktionen bei Fertilitätsstörungen des Mannes, 247  
Impotentia generandi posttraumatica, 239  
Infusionsurographie, 489  
Intravenous urography, complications, 500  
Irradiation of the kidney, renal changes, 511
- Kidney, carcinogenesis, 229  
–, multiple bilateral angioma, 18  
–, the action of oestrogens, 47
- Lavage pyélique, 36  
Lithiasé urinaire, 477
- Mannitol, treatment of patients with uremia, 28, 54, 375, 381  
Mineral waters, 193
- Nebenhoden, granulomatöse Veränderungen, 564  
Nephrolithiasis, 477  
Niere, Carcinogenese, 229  
–, Einfluß der Oestrogene auf die Rinde, 47  
–, Haematurie bei Angiom, 18

- , multiple doppelseitige Angiome, 18
- Nierenbecken, organerhaltende Operationen, 520
- Nierenbeckenspülungen nach TIMMERMANN, 36
- Nierentransplantation, 97–181, 386
  - , operative Technik, 124
  - , Spenderwahl, 120
  - von Leichennieren, 131
- Nierentuberkulose, Behandlung mit Corticoiden, 307
- Nierenveränderungen nach Bestrahlung der Niere, 511
- Oestrogenwirkung auf die Nierenrinde, 47
- Oxaluroolithiasis, 338
- Para-aminomethylbenzoic acid, treatment of post-prostatectomy bleeding, 61
- Pelvis renal, operaciones de los tumores, 520
- Plastic operations, 477
- Prostata, ACTH-Belastung und Leberschädigung, 553
- Prostata, Overloading of ACTH and liver damage, 553
- Prostatectomia supra pubica, 549
- Prostatectomy, persistence of prostatic bed, 68
- Prostatectomy, treatment of bleeding with PAMBA, 61
- Prostatic carcinoma, 77
  - tuberculosis, 329
- Pseudopapillomata, spinal cord injuries, 353
- Reflux urinaire, 531
- Rein, action des œstrogènes, 47
  - , angiomes multiples bilatéraux, 18
  - , étude carcinogénétique, 229
  - , lavage pyélique, 36
  - , transplantation, 97–181, 386
- Renal carcinogenesis, 229
  - changes after irradiation of the kidney, 511
  - pelvic lavage, 36
  - tumors, surgery, 520
  - transplantation, 97–181, 386
  - of cadaver kidneys, 131
  - , operative technic, 124
  - , selection of donor, 120
  - tuberculosis, treatment with corticoids, 307
- Renovasographie bei Angiom der Niere, 18
- Rétrécissement urétral posttraumatique, 209
- Riñon, acción de los estrogénos, 47
  - , angiomas bilaterales, 18
  - , carcinogenesis, 229
  - , lavado piélico, 36
  - , trasplante, 97–181, 186
- Röntgenbestrahlungen, Blasenkomplikationen, 393, 437
- Rückenmarksverletzungen, Pseudopapillome, 353
- Spinal cord injuries, pseudopapillomata, 353
- Strahlencystitis, 393, 437
- Suprapubic prostatectomy, 549
- Testicle, granulomatous lesions, 564
- TIMMERMANN, Nierenbeckenspülungen, 36
- Transplantation du rein de cadavre, 131
  - rénale, éthique médicale, 141
  - , choix du greffon, 120
  - , technique opératoire, 124
- Trasplante de riñón de cadáver, 131
  - renal, 97–181, 386
  - , elección del injerto, 120
  - , técnica operatoria, 124
- Tuberculose de la prostate, 329
  - urinaire, traitement avec des corticoïdes, 307
  - uro-génitale, modifications hormonales, 289
- Uremia, treatment with Mannitol, 28, 54, 375, 381
- Ureteral complications following gynecological surgery, 452
- Urethral stenosis, Johanson plastic operation, 465
  - stricture, posttraumatic, 209
- Uréthro-plastics, 477
- Uréthro-plastics selon Johanson, résultats, 465
- Urinary reflux, 531
- Urogenital tuberculosis, hormonal variations, 289

- Urografia por perfusion, 489  
Urographie intraveineuse, complications, 500  
Urolithiasis, 338, 477
- Vejiga, complicaciones después de la irradiación, 393, 437  
-, complicaciones después histerectomia, 444, 452  
-, estudio experimental, 182  
Vessie, complications après hysterectomie, 444, 452
- , complications après irradiation, 393, 437  
-, étude expérimentale, 182  
-, résorption de substances radioactives, 538
- X-Radiation, renal complications, 511  
X-Radiation, vesical complications, 393, 437
